# Supplementary material for: Toxicology of paraquat and pharmacology of the protective effect of 5-hydroxy-1-methylhydantoin on lung injury caused by paraquat based on metabolomics
Source: PubMed Central journal article supplement (PMC7000692; doi:10.1038/s41598-020-58599-y), 2020-02-04
Supplement: 41598_2020_58599_MOESM1_ESM.pdf [file 41598_2020_58599_MOESM1_ESM.pdf]

**Toxicology of paraquat and pharmacology of the protective effect of  
5-hydroxy-1-methylhydantoin on lung injury caused by paraquat based on metabolomics**

Lina Gao\*, Huiya Yuan, Enyu Xu, Junting Liu

(School of Forensic Medicine, China Medical University, Liaoning, China, 110014)

Pearson correlation between neg QC samples

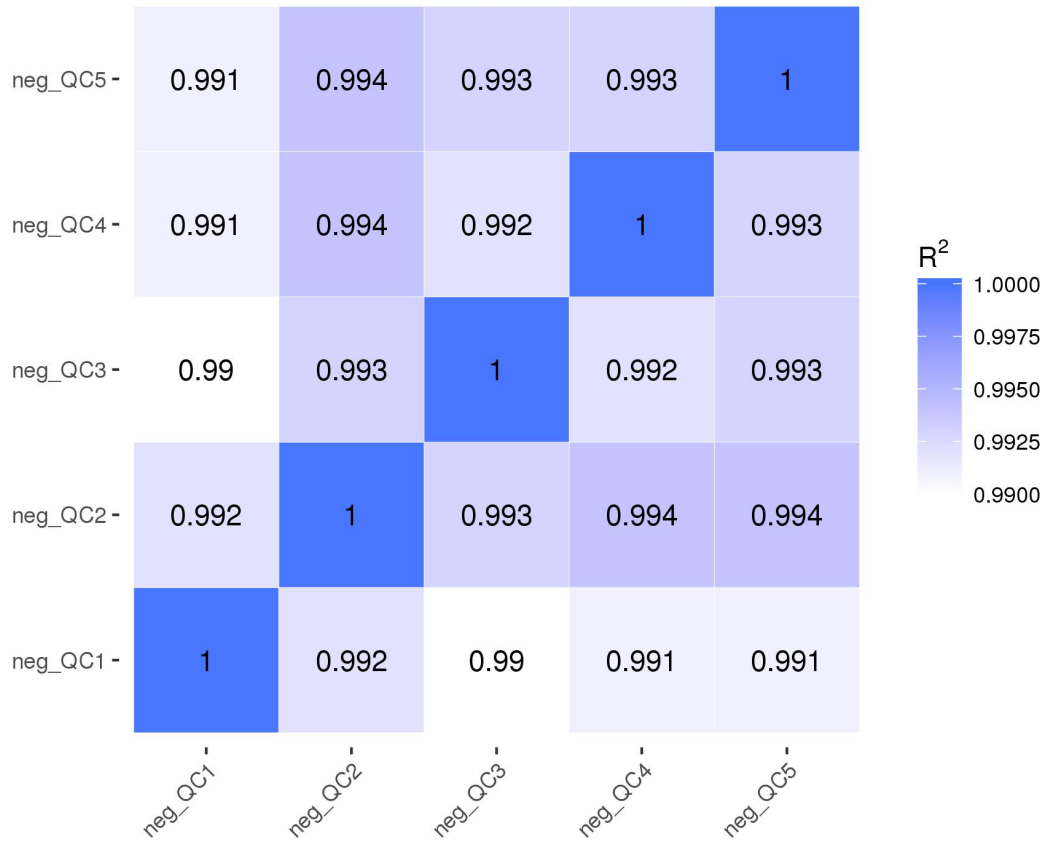

### Pearson correlation between pos QC samples

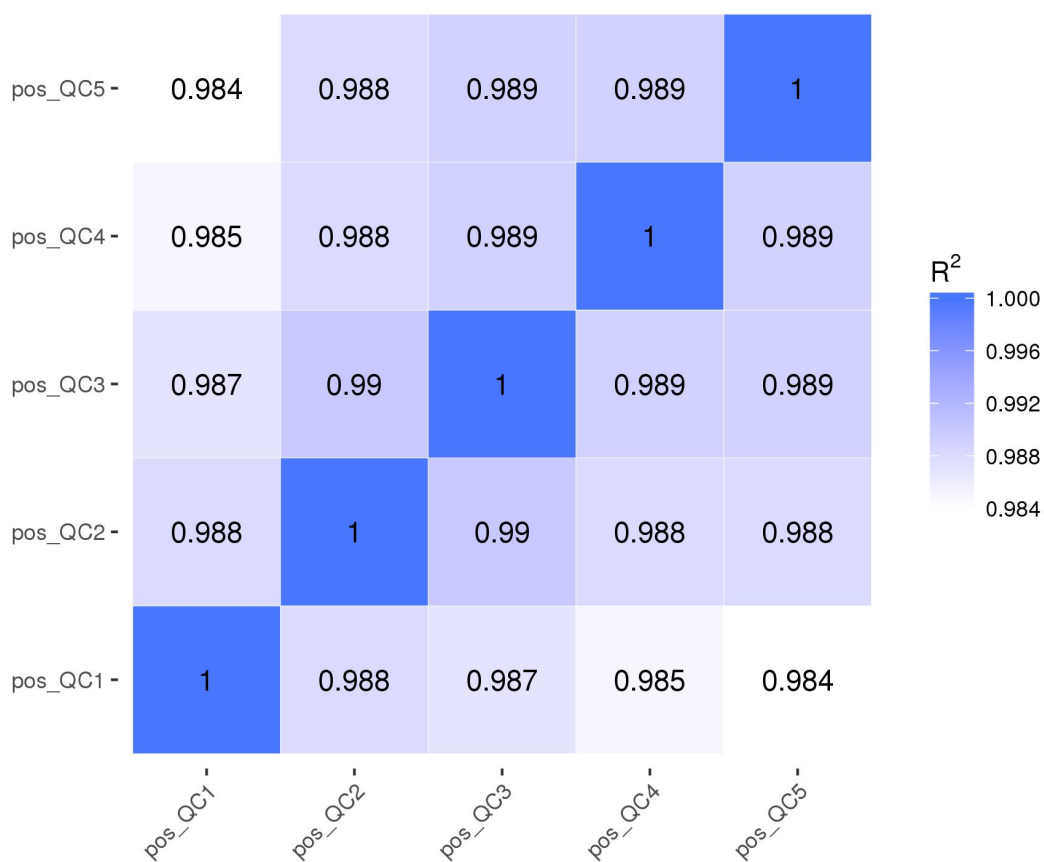

SI Fig.3. Pearson correlation between QC samples (The upper figure was obtained in the negative polarity mode; the bottom figure was obtained in the positive polarity mode).
