# Supplementary material for: Toxicology of paraquat and pharmacology of the protective effect of 5-hydroxy-1-methylhydantoin on lung injury caused by paraquat based on metabolomics
Source: PubMed Central journal article supplement (PMC7000692; doi:10.1038/s41598-020-58599-y), 2020-02-04
Supplement: 41598_2020_58599_MOESM2_ESM.pdf [file 41598_2020_58599_MOESM2_ESM.pdf]

**Toxicology of paraquat and pharmacology of the protective effect of  
5-hydroxy-1-methylhydantoin on lung injury caused by paraquat based on metabolomics**

Lina Gao\*, Huiya Yuan, Enyu Xu, Junting Liu

(School of Forensic Medicine, China Medical University, Liaoning, China, 110014)

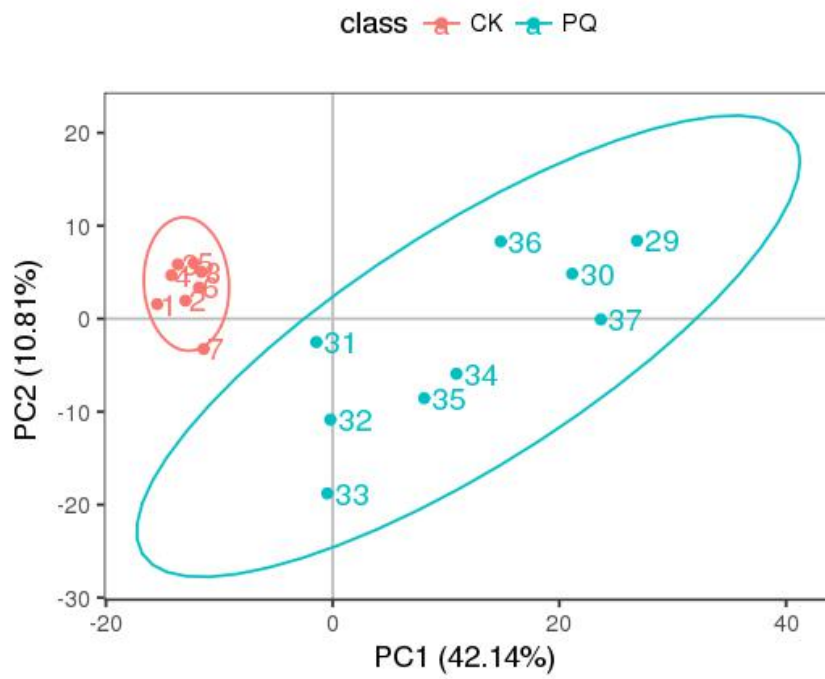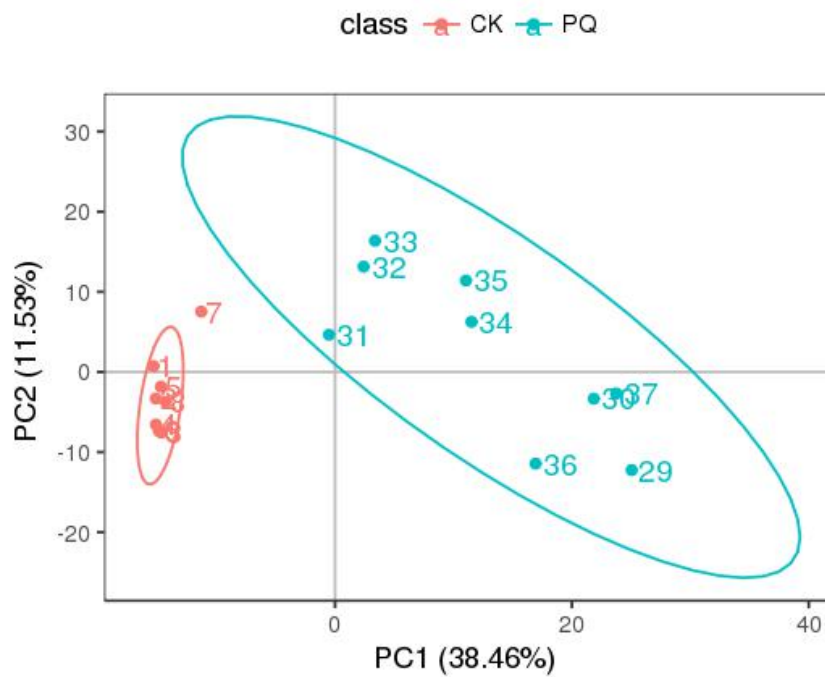

SI Fig.1. Principal component analysis between the PQ group and the control group, the upper figure was obtained in the negative mode, the bottom figure was obtained in the positive mode.
